# Supplementary material for: Biocontrol Agents Reduce Progression and Mycotoxin Production of Fusarium graminearum in Spikelets and Straws of Wheat
Source: MDPI journal article supplement (doi:10.3390/toxins13090597), 2021-08-27
Supplement: s1 [file s1]

# Supplementary Materials: Biocontrol Agents reduce progression and mycotoxin production of *Fusarium graminearum* in spikelets and straws of wheat

Lucile Pellan, Cheikh Ahmeth Tidiane Dieye, Noël Durand, Angélique Fontana, Sabine Schorr-Galindo and Caroline Strub

**Table S1.** Comparative effects of BCA treatments on the external colonization and mycotoxin content of spikelets by *F. graminearum* during antagonist bioassay. Antagonist bioassays were performed on detached spikelet for 12 days at 20°C with photoperiod. N.d.: Not detected, wT: water-Tween, 0.01%.

| Conditions                         | Day | External Colonisation<br>(Scoring scale) |      |                | Mycotoxin Content (DON)<br>(ug.kg <sup>-1</sup> ) |           |                |
|------------------------------------|-----|------------------------------------------|------|----------------|---------------------------------------------------|-----------|----------------|
|                                    |     | Number of Replicate                      | Mean | Standard Error | Number of Replicate                               | Mean      | Standard Error |
| wT ( - Control)                    | 3   | 15                                       | 0.00 | 0.00           | 12                                                | 0.00/n.d. | 0.00           |
| <i>F. graminearum</i> (+ Control)  | 3   | 15                                       | 1.33 | 0.21           | 12                                                | 650.94    | 69.07          |
| <i>F. graminearum</i> + Mycostop   | 3   | 15                                       | 0.00 | 0.00           | 12                                                | 0.00/n.d. | 0.00           |
| <i>F. graminearum</i> + Xedavir    | 3   | 15                                       | 0.00 | 0.00           | 12                                                | 0.00/n.d. | 0.00           |
| <i>F. graminearum</i> + Polyversum | 3   | 15                                       | 0.00 | 0.00           | 12                                                | 0.00/n.d. | 0.00           |
| wT ( - Control)                    | 5   | 15                                       | 0.00 | 0.00           | 12                                                | 0.00/n.d. | 0.00           |
| <i>F. graminearum</i> (+ Control)  | 5   | 15                                       | 3.67 | 0.21           | 12                                                | 3046.22   | 675.40         |
| <i>F. graminearum</i> + Mycostop   | 5   | 15                                       | 0.00 | 0.00           | 12                                                | 0.00/n.d. | 0.00           |
| <i>F. graminearum</i> + Xedavir    | 5   | 15                                       | 0.17 | 0.17           | 12                                                | 0.00/n.d. | 0.00           |
| <i>F. graminearum</i> + Polyversum | 5   | 15                                       | 0.17 | 0.17           | 12                                                | 0.00/n.d. | 0.00           |
| wT ( - Control)                    | 8   | 15                                       | 0.00 | 0.00           | 12                                                | 0.00/n.d. | 0.00           |
| <i>F. graminearum</i> (+ Control)  | 8   | 15                                       | 4.00 | 0.00           | 12                                                | 4307.23   | 1046.60        |
| <i>F. graminearum</i> + Mycostop   | 8   | 15                                       | 0.00 | 0.00           | 12                                                | 0.00/n.d. | 0.00           |
| <i>F. graminearum</i> + Xedavir    | 8   | 15                                       | 0.83 | 0.17           | 12                                                | 0.00/n.d. | 0.00           |
| <i>F. graminearum</i> + Polyversum | 8   | 15                                       | 1.50 | 0.22           | 12                                                | 0.00/n.d. | 0.00           |
| wT ( - Control)                    | 10  | 15                                       | 0.00 | 0.00           | 12                                                | 0.00/n.d. | 0.00           |
| <i>F. graminearum</i> (+ Control)  | 10  | 15                                       | 4.50 | 0.22           | 12                                                | 1337.56   | 581.21         |
| <i>F. graminearum</i> + Mycostop   | 10  | 15                                       | 0.33 | 0.33           | 12                                                | 164.10    | 164.10         |
| <i>F. graminearum</i> + Xedavir    | 10  | 15                                       | 1.17 | 0.17           | 12                                                | 0.00/n.d. | 0.00           |
| <i>F. graminearum</i> + Polyversum | 10  | 15                                       | 1.33 | 0.21           | 12                                                | 46.04     | 46.04          |
| wT ( - Control)                    | 12  | 15                                       | 0.33 | 0.21           | 12                                                | 0.00/n.d. | 0.00           |
| <i>F. graminearum</i> (+ Control)  | 12  | 15                                       | 5.00 | 0.00           | 12                                                | 1240.86   | 145.70         |
| <i>F. graminearum</i> + Mycostop   | 12  | 15                                       | 2.00 | 0.37           | 12                                                | 543.29    | 230.16         |
| <i>F. graminearum</i> + Xedavir    | 12  | 15                                       | 2.00 | 0.26           | 12                                                | 0.00/n.d. | 0.00           |
| <i>F. graminearum</i> + Polyversum | 12  | 15                                       | 2.00 | 0.37           | 12                                                | 384.48    | 288.24         |

**Table S2.** Comparative quantification of *F. graminearum* and Xeda biomarkers on detached spikelet. Antagonist bioassays were performed on detached spikelet at 20°C with photoperiod, and analyzed after 8 days of co-culture. wT: water-Tween, 0.01%.

| Conditions                         | Number of Replicate | Quantity of biomarker copy of <i>F. graminearum</i> (nbr.µl <sup>-1</sup> ) |                    | Quantity of Biomarker Copy of Xedavir (nbr.µl <sup>-1</sup> ) |                    |
|------------------------------------|---------------------|-----------------------------------------------------------------------------|--------------------|---------------------------------------------------------------|--------------------|
|                                    |                     | Mean                                                                        | Standard Deviation | Mean                                                          | Standard Deviation |
| wT ( - Control)                    | 3                   | 0.00                                                                        | 0.00               | 0.00                                                          | 0.00               |
| <i>F. graminearum</i> (+ Control)  | 3                   | 31353.33                                                                    | 9085.75            | 0.00                                                          | 0.00               |
| Mycostop                           | 3                   | 0.00                                                                        | 0.00               | 0.00                                                          | 0.00               |
| <i>F. graminearum</i> + Mycostop   | 3                   | 12.38                                                                       | 5.37               | 0.00                                                          | 0.00               |
| Xedavir                            | 3                   | 0.00                                                                        | 0.00               | 6826.67                                                       | 4381.58            |
| <i>F. graminearum</i> + Xedavir    | 3                   | 69.15                                                                       | 51.83              | 7766.83                                                       | 2612.58            |
| Polyversum                         | 3                   | 0.00                                                                        | 0.00               | 0.00                                                          | 0.00               |
| <i>F. graminearum</i> + Polyversum | 3                   | 1626.33                                                                     | 766.12             | 0.00                                                          | 0.00               |

**Table S3.** Comparative effect of BCAs on perithecia production by *F. graminearum* during antagonistic bioassay on wheat straw. Antagonistic bioassays were performed on wheat straw for 3 weeks at 20°C in dark.

| Conditions                         | Number of Replicate | Quantity of Perithecia (nb. of perithecia) |                |
|------------------------------------|---------------------|--------------------------------------------|----------------|
|                                    |                     | Mean                                       | Standard Error |
| <i>F. graminearum</i> (Control)    | 18                  | 10.39                                      | 2.22           |
| <i>F. graminearum</i> + Mycostop   | 18                  | 1.17                                       | 0.42           |
| <i>F. graminearum</i> + Xedavir    | 18                  | 0.17                                       | 0.17           |
| <i>F. graminearum</i> + Polyversum | 18                  | 1.06                                       | 0.78           |
